# Supplementary material for: Gestational Diabetes Mellitus: Predictive Value of Fetal Growth Measurements by Ultrasonography at 22–24 Weeks: A Retrospective Cohort Study of Medical Records
Source: PubMed Central journal article supplement (PMC7760346; doi:10.3390/nu12123645), 2020-11-27
Supplement: nutrients-12-03645-s001.pdf [file nutrients-12-03645-s001.pdf]

**Table S1.** Proportions of fetuses in this Chinese population that would be classified with extreme fetal growth by the WHO standard, INTERGROWTH -21<sup>st</sup> standard, and Chinese standard.

| Factor                                        | WHO standard   |              |       | INTERGROWTH-21st standard |              |       | Chinese standard |              |       |
|-----------------------------------------------|----------------|--------------|-------|---------------------------|--------------|-------|------------------|--------------|-------|
|                                               | Non-GDM, n (%) | GDM, n (%)   | p*    | Non-GDM, n (%)            | GDM, n (%)   | p*    | Non-GDM, n (%)   | GDM, n (%)   | p*    |
| AC                                            |                |              | 0.17  |                           |              | 0.16  |                  |              | 0.17  |
| <10 <sup>th</sup> percentile                  | 2,006 (5.6)    | 436 (5.2)    |       | 1,921 (5.4)               | 408 (4.9)    |       | 2,740 (7.6)      | 594 (7.1)    |       |
| 10 <sup>th</sup> -90 <sup>th</sup> percentile | 29,263 (81.6)  | 6,773 (81.4) |       | 28,177 (78.6)             | 6,538 (78.5) |       | 30,437 (84.9)    | 7,078 (85.0) |       |
| >90 <sup>th</sup> percentile                  | 4,586 (12.8)   | 1,115 (13.4) |       | 5,757 (16.1)              | 1,378 (16.6) |       | 2,678 (7.5)      | 652 (7.8)    |       |
| HC                                            |                |              | 0.041 |                           |              | 0.021 |                  |              | 0.087 |
| <10 <sup>th</sup> percentile                  | 3,363 (9.4)    | 856 (10.3)   |       | 5,503 (15.3)              | 1,376 (16.5) |       | 3,758 (10.5)     | 934 (11.2)   |       |
| 10 <sup>th</sup> -90 <sup>th</sup> percentile | 28,700 (80.0)  | 6,599 (79.3) |       | 27,977 (78.0)             | 6,422 (77.2) |       | 29,487 (82.2)    | 6,815 (81.9) |       |
| >90 <sup>th</sup> percentile                  | 3,792 (10.6)   | 869 (10.4)   |       | 2,375 (6.6)               | 526 (6.3)    |       | 2,610 (7.3)      | 575 (6.9)    |       |
| FL                                            |                |              | 0.004 |                           |              | 0.022 |                  |              | 0.33  |
| <10 <sup>th</sup> percentile                  | 3,227 (9.0)    | 842 (10.1)   |       | 3,776 (10.5)              | 963 (11.6)   |       | 1,113 (3.1)      | 277 (3.3)    |       |
| 10 <sup>th</sup> -90 <sup>th</sup> percentile | 30,402 (84.8)  | 6,948 (83.5) |       | 28,641 (79.9)             | 6,579 (79.0) |       | 32,728 (91.3)    | 7,556 (90.8) |       |
| >90 <sup>th</sup> percentile                  | 2,226 (6.2)    | 534 (6.4)    |       | 3,438 (9.6)               | 782 (9.4)    |       | 2,014 (5.6)      | 491 (5.9)    |       |
| EFW                                           |                |              | 0.039 |                           |              | 0.46  |                  |              | 0.22  |
| <10 <sup>th</sup> percentile                  | 2411 (6.7)     | 599 (7.2)    |       | 11,765 (32.8)             | 2,731 (32.8) |       | 998 (2.8)        | 254 (3.1)    |       |
| 10 <sup>th</sup> -90 <sup>th</sup> percentile | 27369 (76.3)   | 6245 (75.0)  |       | 22,374 (62.4)             | 5,168 (62.1) |       | 25,567 (71.3)    | 5,870 (70.5) |       |
| >90 <sup>th</sup> percentile                  | 6075 (16.9)    | 1480 (17.8)  |       | 1,716 (4.8)               | 425 (5.1)    |       | 9,290 (25.9)     | 2,200 (26.4) |       |

\* Presented as frequency, n (%), and compared using  $\chi^2$  tests.

**Table S2** Association between fetal biometry at 22-24 gestational week and subsequent GDM based on INTERGROWTH-21st standard.

| Main exposure                                            | GDM, n (%)   | Crude OR (95% CI) | Adjusted OR† (95% CI) | Adjusted OR‡ (95% CI) |
|----------------------------------------------------------|--------------|-------------------|-----------------------|-----------------------|
| <b>AC</b>                                                |              |                   |                       |                       |
| <10 <sup>th</sup> percentile (n=2,329)                   | 408 (17.5)   | 0.92(0.82,1.02)   | 0.98(0.87,1.09)       | 0.97(0.87,1.09)       |
| 10 <sup>th</sup> -90 <sup>th</sup> percentile (n=34,715) | 6,538 (18.8) |                   | 1.0(reference)        |                       |
| >90 <sup>th</sup> percentile (n=7,135)                   | 1,378 (19.3) | 1.03(0.97,1.10)   | 0.97(0.91,1.04)       | 0.97(0.92,1.04)       |
| <b>HC</b>                                                |              |                   |                       |                       |
| <10 <sup>th</sup> percentile (n=6,879)                   | 1,376 (20.0) | 1.09(1.02,1.16) * | 1.15(1.08,1.23) *     | 1.12(1.05,1.20) *     |
| 10 <sup>th</sup> -90 <sup>th</sup> percentile (n=34,399) | 6,422 (18.7) |                   | 1.0(reference)        |                       |
| >90 <sup>th</sup> percentile (n=2,901)                   | 526 (18.1)   | 0.97(0.88,1.07)   | 0.92(0.84,1.02)       | 0.93(0.84,1.03)       |
| <b>FL</b>                                                |              |                   |                       |                       |
| <10 <sup>th</sup> percentile (n=4,739)                   | 963 (20.3)   | 1.11(1.03,1.20) * | 1.17(1.08,1.26) *     | 1.14(1.05,1.23) *     |
| 10 <sup>th</sup> -90 <sup>th</sup> percentile (n=35,220) | 6,579 (18.7) |                   | 1.0(reference)        |                       |
| >90 <sup>th</sup> percentile (n=4,220)                   | 782 (18.3)   | 0.99(0.91,1.08)   | 0.95(0.88,1.04)       | 0.95(0.87,1.03)       |
| <b>EFW</b>                                               |              |                   |                       |                       |
| <10 <sup>th</sup> percentile (n=14,496)                  | 2,731 (18.8) | 1.00(0.95,1.06)   | 1.06(1.01,1.12) *     | 1.05(1.00,1.11)       |
| 10 <sup>th</sup> -90 <sup>th</sup> percentile (n=27,542) | 5,168 (18.8) |                   | 1.0(reference)        |                       |
| >90 <sup>th</sup> percentile (n=2,141)                   | 425 (19.9)   | 1.08(0.96,1.20)   | 1.02(0.91,1.14)       | 1.00(0.89,1.12)       |

\*P<0.05 †Adjusted for maternal age, parity and fetal sex. ‡Adjusted for maternal age, parity, fetal sex, pre-pregnancy height and pre-pregnancy BMI. OR=odds ratio; AC=abdominal circumference; HC=head circumference; FL=femur length; EFW=estimated fetal weight.

**Table S3** Association between fetal biometry at 22-24 gestational weeks and subsequent GDM based on Chinese standard

| Main exposure                                            | GDM, n (%)   | Crude OR (95% CI) | Adjusted OR† (95% CI) | Adjusted OR‡ (95% CI) |
|----------------------------------------------------------|--------------|-------------------|-----------------------|-----------------------|
| <b>AC</b>                                                |              |                   |                       |                       |
| <10 <sup>th</sup> percentile (n=3,334)                   | 594 (17.8)   | 0.93(0.85,1.02)   | 0.99(0.91,1.09)       | 1.00(0.90,1.09)       |
| 10 <sup>th</sup> -90 <sup>th</sup> percentile (n=37,515) | 7,078 (18.9) |                   | 1.0(reference)        |                       |
| >90 <sup>th</sup> percentile (n=3,330)                   | 653 (19.6)   | 1.05(0.96,1.14)   | 0.98(0.90,1.08)       | 0.97(0.88,1.06)       |
| <b>HC</b>                                                |              |                   |                       |                       |
| <10 <sup>th</sup> percentile (n=4,692)                   | 934 (19.9)   | 1.07(0.99,1.16)   | 1.14(1.05,1.23) *     | 1.12(1.04,1.21) *     |
| 10 <sup>th</sup> -90 <sup>th</sup> percentile (n=36,302) | 6,811 (18.8) |                   | 1.0(reference)        |                       |
| >90 <sup>th</sup> percentile (n=3,185)                   | 575 (18.1)   | 0.91(0.83,1.01)   | 0.91(0.83,1.01)       | 0.92(0.83,1.01)       |
| <b>FL</b>                                                |              |                   |                       |                       |
| <10 <sup>th</sup> percentile (n=1,390)                   | 277 (19.9)   | 1.07(0.94,1.22)   | 1.15(1.01,1.32) *     | 1.12(0.98,1.29)       |
| 10 <sup>th</sup> -90 <sup>th</sup> percentile (n=40,284) | 7,556 (18.8) |                   | 1.0(reference)        |                       |
| >90 <sup>th</sup> percentile (n=2,505)                   | 491 (19.6)   | 1.01(0.92,1.13)   | 1.01(0.92,1.13)       | 1.00(0.90,1.11)       |
| <b>EFW</b>                                               |              |                   |                       |                       |
| <10 <sup>th</sup> percentile (n=1,252)                   | 254 (20.3)   | 1.11(0.96,1.27)   | 1.18(1.03,1.36) *     | 1.14(0.99,1.31)       |
| 10 <sup>th</sup> -90 <sup>th</sup> percentile (n=31,437) | 5,870 (18.7) |                   | 1.0(reference)        |                       |
| >90 <sup>th</sup> percentile (n=11,490)                  | 2,200 (19.1) | 1.03(0.98,1.09)   | 0.97(0.92,1.03)       | 0.98(0.92,1.03)       |

\*P<0.05 †Adjusted for maternal age, parity and fetal sex. ‡Adjusted for maternal age, parity, fetal sex, pre-pregnancy height and pre-pregnancy BMI. OR=odds ratio;

AC=abdominal circumference; HC=head circumference; FL=femur length; EFW=estimated fetal weight.
